# Supplementary material for: High-yield synthesis of graphene quantum dots with strong green photoluminescence
Source: Royal Society of Chemistry journal article supplement (doi:10.1039/c4ra10011e), 2014-01-01
Supplement: c4ra10011e1.pdf [file c4ra10011e1.pdf]

**Electronic supplementary information for:**

## **High-yield Synthesis of Graphene Quantum Dots with Strong Green Photoluminescence**

**Jian Gu,<sup>a, b</sup> Mingjun Hu,<sup>a</sup> Qiuquan Guo,<sup>a</sup> Zhifeng Ding,<sup>c</sup> Xueliang Sun<sup>a</sup>  
and Jun Yang \*<sup>a</sup>**

**a. Department of Mechanical & Materials Engineering, The University of Western  
Ontario, London, ON, Canada, N6A 5B9**

**b. Hubei Institute of Aerospace Chemotechnology, Xiangyang, P. R. China, 441003**

**c. Department of Chemistry, The University of Western Ontario, London, ON,  
Canada, N6A 5B7**

## **Supplementary information**

### **Experimental Section**

#### **Chemicals**

D-(+)-glucose ( $\geq 99.5\%$ ), ethylenediamine ( $\geq 99.5\%$ ) and quinine sulfate ( $\geq 98.0\%$ ) were purchased from Sigma Aldrich. Hydrochloric acid (36.5-38.0wt. %) was supplied by Fisher Scientific. All chemicals were of analytical grade and used as received. DI-water used throughout all experiments was purified with a Millipore water system.

#### **Synthesis of GQDs**

GQDs were synthesized using glucose, ethylenediamine (EDA) and hydrochloric acid (HCl) as source materials. 1.0 g glucose, 400  $\mu\text{L}$  EDA and 200  $\mu\text{L}$  HCl were dissolved in 15 mL DI-water to form a transparent solution, which was then transferred into a 25 mL Teflon lined stainless steel autoclave and heated at 150-200  $^{\circ}\text{C}$  for 3-6 h. After being cooled down, the as-received brown reaction solution was treated with further dialysis (the purification process was introduced as below) and vacuum drying to obtain the GQDs with a yield of ca. 60-70%. No strong acid treatment or further surface modification was needed in the synthesis process. The schematic representation of the growth mechanism of obtained GQDs is depicted in Figure S1.

#### **Purification process**

A “two-steps” purification process was employed to dialyse the as-received brown reaction solution by using two kinds of dialysis bags with molecular weight (Mw) of 3500 Da and 1000 Da in order to improve the purity of GQDs. The brown reaction solution was first dialysed for 5-8 h by using the dialysis bag with Mw of 3500 Da, and then the GQDs solution outside the dialysis bag with Mw of 3500 Da was dialysed again for 3-7 h by using the dialysis bag with Mw of 1000 Da. Finally, the GQDs solution inside the dialysis bag with Mw of 1000 Da was collected as the ultimate GQDs solution, which was used for the next investigation.

#### **Characterizations**

High-resolution transmission electron microscope (HRTEM) images were performed on JEM-2010F system operating at 200 kV. The specimens were prepared by drop-casting the sample

solution onto an ultrathin carbon coated copper grid, followed by drying at room temperature. The surface morphology and height distribution of obtained GQDs were measured by an atomic force microscopy (AFM, Dimension 3100) under ambient conditions. Fluorescence spectra of obtained GQDs were performed using a QuantaMaster™ 300 Plus Fluorescence Spectrofluorometer. The fluorescent images, green light emission, and the filters have been integrated in the fluorescence microscope. UV-Vis absorption spectrum was recorded using a Cary 100 UV-Visible spectrophotometer. Raman spectra of GQDs were measured by a Kaiser optical system (Ramanrxn™ Instrument) using a 785 nm laser. Fourier transform infrared (FTIR) spectra were taken on a Bruker IFS 55 FT-IR spectrophotometer. X-Ray photoelectron spectroscopy (XPS) data were recorded with a Kratos AXIS Ultra spectrometer with a monochromatized Al Ka X-ray source (1486.71 eV) for determining the compositions and chemical bonding configurations. Binding energy calibration was based on C1s at 284.5 eV.

#### **QY measurements**<sup>1,2</sup>

Quinine sulfate (QS, 0.1 M H<sub>2</sub>SO<sub>4</sub> as solvent; FL QY=54.0%) was chosen as the standard. The FL spectra, UV-Vis spectra of QS and obtained GQDs solutions with different concentrations were measured, respectively. Then FL QY of GQDs (in water) may be calculated according to the equation (1).

$$\phi_x = \phi_{st} (K_x / K_{st})(\eta_x / \eta_{st}) \quad (1)$$

where  $\phi$  is the FL QY,  $K$  is the slope determined by the FL intensity vs. UV-Vis intensity curves and  $\eta$  is the refractive index of the solvent. The subscript “st” refers to a standard with known FL QY and “x” for the unknown samples. For these aqueous solutions,  $\eta_x / \eta_{st} = 1$ . In order to minimize the re-absorption effects, absorption in the 10 mm FL cuvette was kept below 0.10 at the excitation wavelength.

## Supplementary Figures

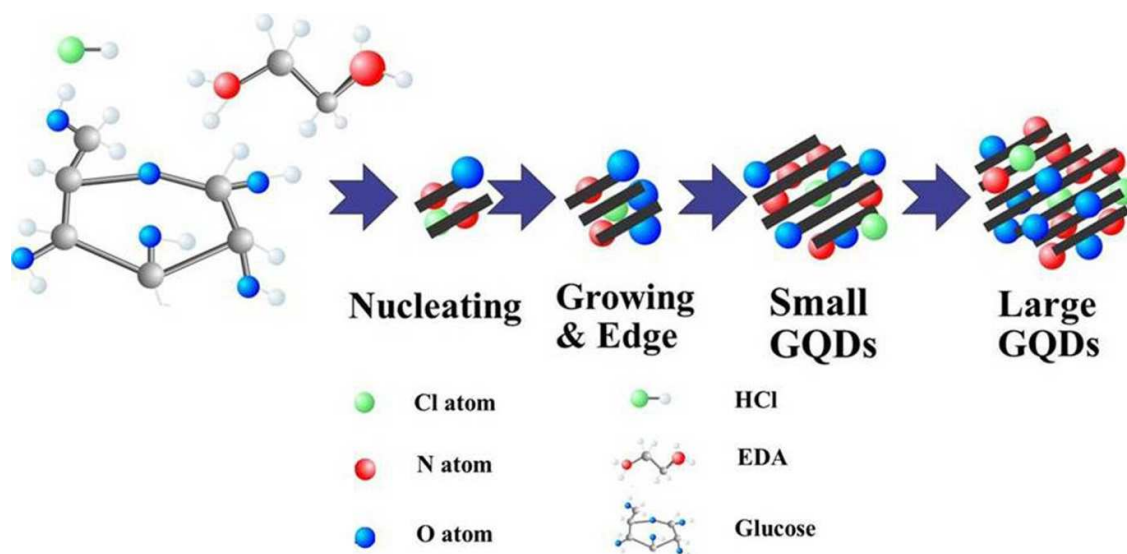

Figure S1 The growth mechanism of obtained GQDs

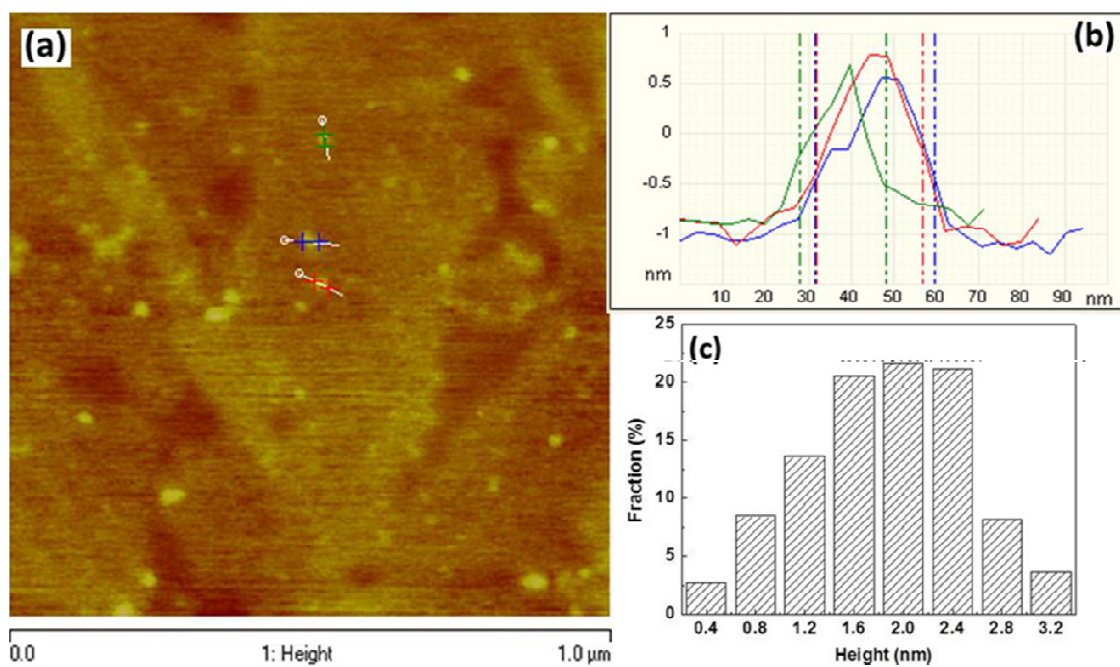

Figure S2 AFM images and height distribution of obtained GQDs.

(a), (b) AFM images; (c) Height distribution

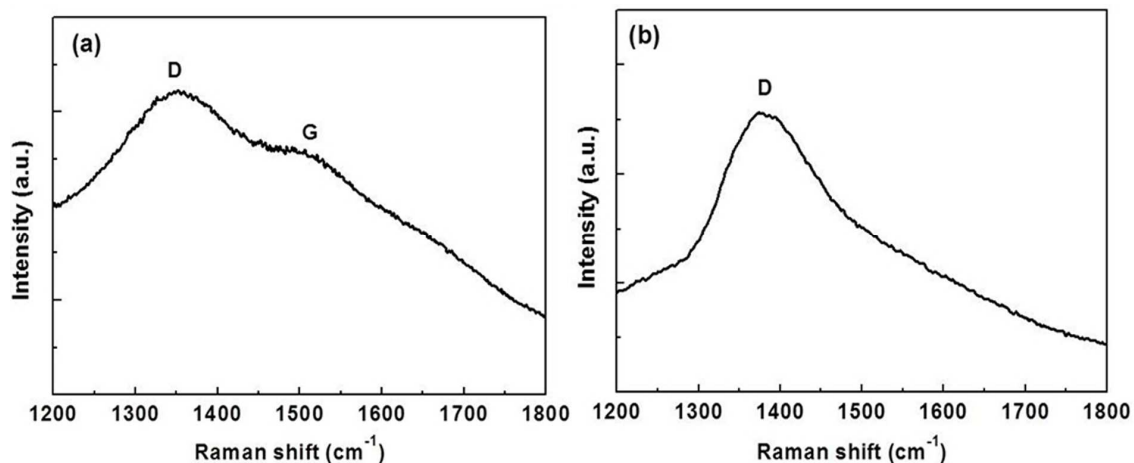

**Figure S3 Raman spectra of GQDs. (a) GQDs in this work (44.3%, Table S3); (b) GQDs with higher FL QY (75.2%)**

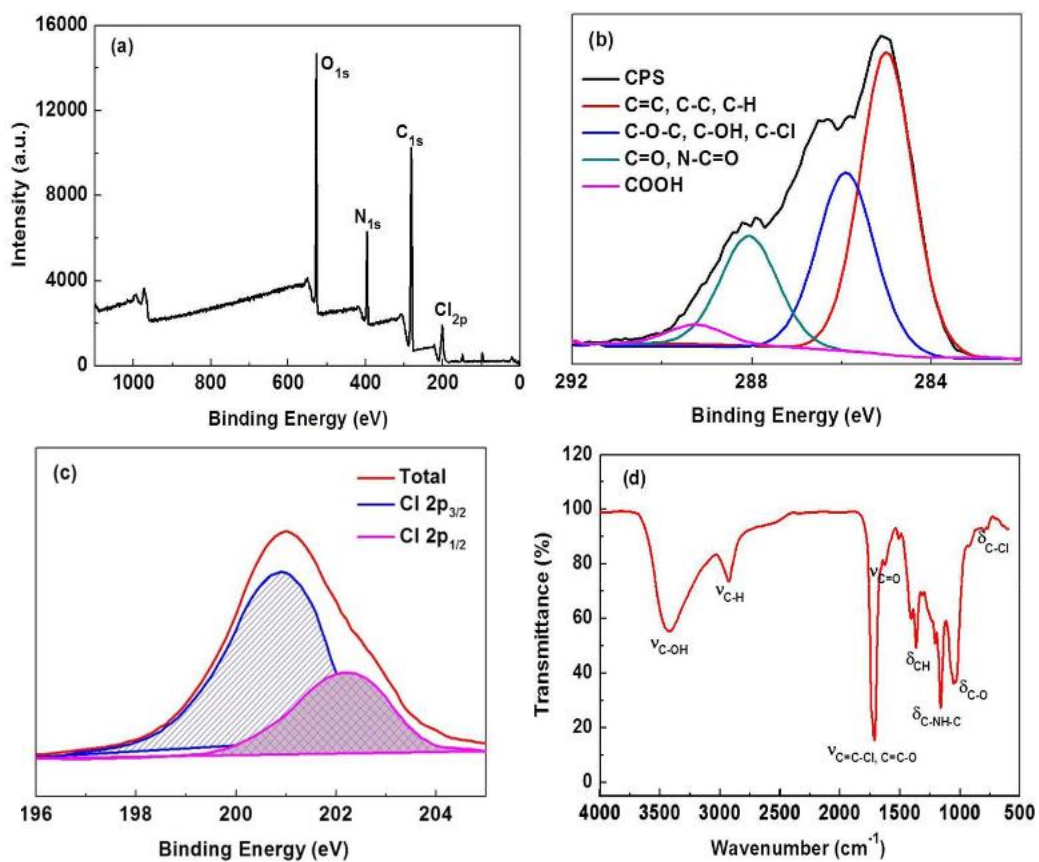

**Figure S4 (a) Full-scan XPS spectrum; (b) C1s XPS spectrum; (c) Cl2p XPS spectrum; (d) FTIR spectrum of obtained GQDs**

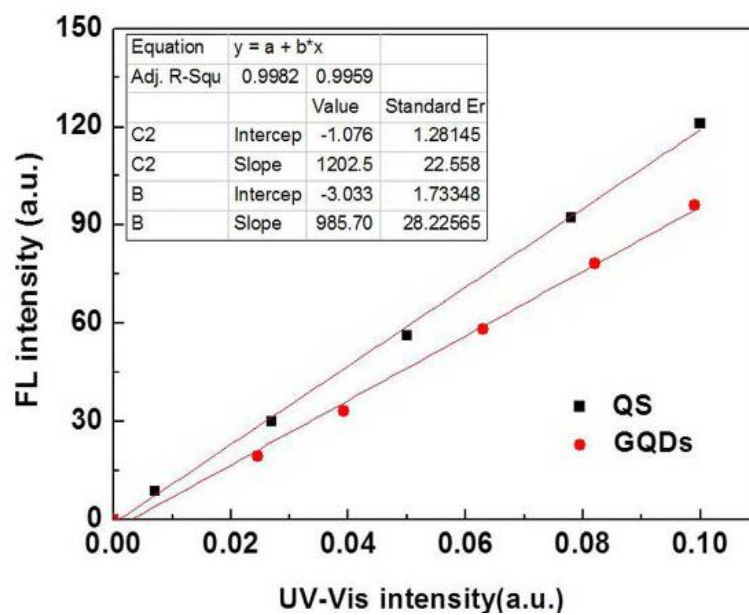

Figure S5 The plot of FL intensity with respect to UV-Vis intensity

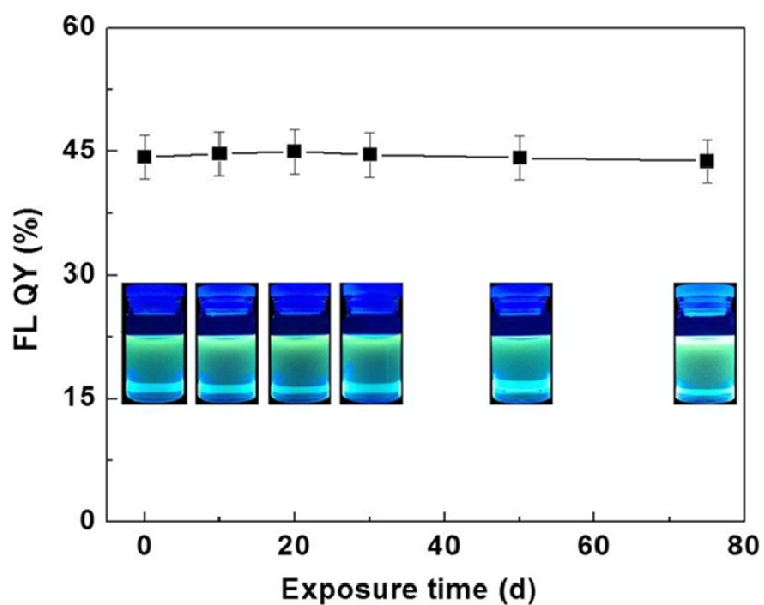

Figure S6 Effect of the exposure time under visible light on the green PL and FL QY of obtained GQDs

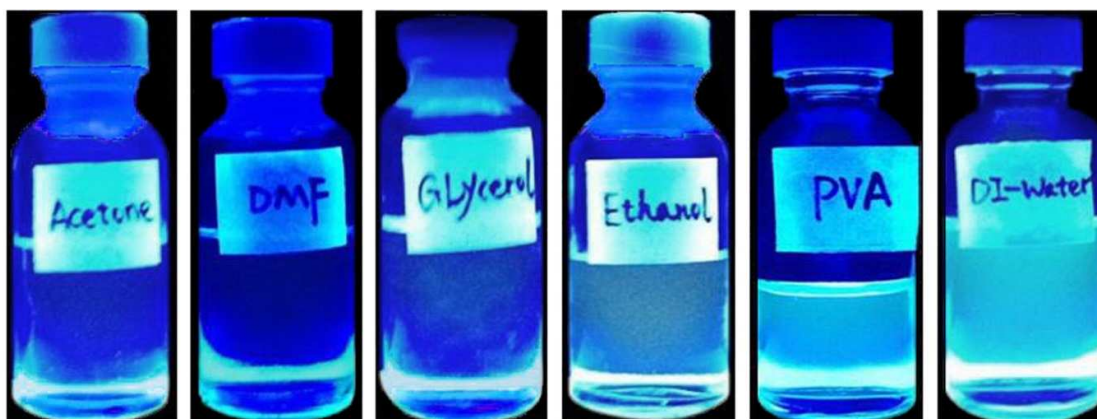

**Figure S7** The solubility and PL of obtained GQDs in different solvents, and the solvents are acetone, DMF, glycerol, ethanol, PVA and DI-water in turn

## Supplementary Tables

**Table S1** The relative contents of various elements on the surface of obtained GQDs

| Elements | Peak binding energy (eV) | Relative content (at. %) |
|----------|--------------------------|--------------------------|
| C1s      | 284.75                   | 57.2                     |
| O1s      | 286.15/288.15/289.15     | 23.4                     |
| N1s      | 288.15                   | 14.6                     |
| Cl2p     | 286.15                   | 5.8                      |

**Table S2 UV-Vis intensity, FL intensity of the GQDs aqueous solution and  
QS/0.1 M H<sub>2</sub>SO<sub>4</sub> solution with different concentrations**

| Tested solutions                       | Concentration (M)  | UV-Vis intensity (a.u.) | FL intensity (a.u.) |
|----------------------------------------|--------------------|-------------------------|---------------------|
| QS/0.1M H <sub>2</sub> SO <sub>4</sub> | 7×10 <sup>-8</sup> | 0.01                    | 15.8                |
|                                        | 1×10 <sup>-7</sup> | 0.014                   | 30.6                |
|                                        | 3×10 <sup>-7</sup> | 0.03                    | 59.6                |
|                                        | 5×10 <sup>-7</sup> | 0.059                   | 106.9               |
|                                        | 7×10 <sup>-7</sup> | 0.084                   | 139.2               |
| GQDs aqueous                           | 7×10 <sup>-8</sup> | 0.0245                  | 19.4                |
|                                        | 1×10 <sup>-7</sup> | 0.0392                  | 33.1                |
|                                        | 3×10 <sup>-7</sup> | 0.063                   | 58.2                |
|                                        | 5×10 <sup>-7</sup> | 0.082                   | 78.3                |
|                                        | 7×10 <sup>-7</sup> | 0.099                   | 96.1                |

**Table S3 FL QY of obtained GQDs**

| Serial                | QS      | GQDs   |
|-----------------------|---------|--------|
| <i>K</i>              | 1202.51 | 985.70 |
| <i>R</i> <sup>2</sup> | 0.9982  | 0.9959 |
| <i>φ</i> (%)          | 54.0    | 44.3   |

## Supplementary References

- 1 S. J. Zhuo, M. W. Shao and S. T. Lee, *ACS Nano*, 2012, **6**, 1059.
- 2 Z. H. Wang, J. F. Xia, C. F. Zhou, B. Via, Y. Z. Xia, F. F. Zhang, Y. H. Li, L. H. Xia and J. Tang, *Col. Surf. B: Biointerfaces*, 2013, **112**, 192.
